1 **Semi-field and surveillance data define the natural diapause timeline**  
2 **for *Culex pipiens* across the United States**

3 Eleanor N. Field<sup>1</sup>, John J. Shepard<sup>2</sup>, Mark E. Clifton<sup>3</sup>, Keith J. Price<sup>4</sup>, Bryn J. Witmier<sup>4</sup>,  
4 Kirk Johnson<sup>5</sup>, Broox Boze<sup>6</sup>, Charles Abadam<sup>7</sup>, Gregory D. Ebel<sup>8</sup>, Philip M. Armstrong<sup>2</sup>,  
5 Christopher M. Barker<sup>9</sup>, Ryan C. Smith<sup>1,\*</sup>

6 <sup>1</sup>Department of Entomology, Iowa State University, Ames, Iowa 50011

7 <sup>2</sup>Department of Environmental Sciences, Connecticut Agricultural Experiment Station,  
8 New Haven, Connecticut 06511

9 <sup>3</sup>North Shore Mosquito Abatement District, Northfield, Illinois 60093

10 <sup>4</sup>Pennsylvania Department of Environmental Protection, Harrisburg, Pennsylvania 17110

11 <sup>5</sup>Metropolitan Mosquito Control District, St. Paul, Minnesota 55104

12 <sup>6</sup>Vector Disease Control International, Broomfield, CO 80020

13 <sup>7</sup>Suffolk Mosquito Control District, Suffolk, Virginia 23234

14 <sup>8</sup>Department of Microbiology, Immunology and Pathology, Colorado State University, Ft.  
15 Collins, Colorado 80523

16 <sup>9</sup>Department of Pathology, Microbiology and Immunology, School of Veterinary Medicine,  
17 University of California, Davis, Davis, California 95616

18 \*Corresponding author: [smithr@iastate.edu](mailto:smithr@iastate.edu)

19 **Keywords:** diapause, *Culex pipiens*, mosquito physiology, population ecology,  
20 temperature, photoperiod, surveillance, West Nile virus

## 21 **Abstract**

22 *Culex pipiens* is a globally-distributed mosquito of medical and veterinary importance,  
23 serving as a primary vector of West Nile virus (WNV). To survive winter, female *Cx.*  
24 *pipiens* mosquitoes undergo adult reproductive diapause initiated by photoperiod and  
25 temperature cues. While well-studied under laboratory conditions, the environmental  
26 signals that promote *Cx. pipiens* diapause induction in natural settings are less  
27 understood. Here, we evaluate *Cx. pipiens* in laboratory and semi-field studies to examine  
28 diapause induction, defining an approximate timeline beginning in late-August where  
29 mosquitoes become receptive to diapause. Using gravid (reproductive) mosquito  
30 surveillance data as a proxy for adult diapause incidence for locations across the United  
31 States (California, Colorado, Connecticut, Illinois, Iowa, Minnesota, Pennsylvania, and  
32 Virginia), we demonstrate consistent population declines coinciding with periods of  
33 diapause receptivity except in hybridization zones where *Cx. quinquefasciatus* is present,  
34 suggesting that *Culex* population genetics can significantly impact end-season population  
35 trends. Together, this study defines a window for diapause induction across the United  
36 States, shaped by temperature, latitude, elevation, and mosquito population genetics.  
37 Coinciding with the cessation of WNV activity, these data can have important implications  
38 for mosquito control, where targeted efforts prior to diapause induction can decrease  
39 mosquito populations and WNV overwintering to reduce mosquito-borne disease  
40 incidence the following season.

## 41 **Introduction**

42 Insects are one of the most diverse lifeforms on the planet, relying on a myriad of  
43 evolutionary adaptations to survive adverse ecological environments and climate  
44 conditions. This includes a state of dormancy known as diapause that is used to facilitate  
45 overwintering survival in temperate regions (1, 2), which depending on species can occur  
46 during the egg, larval, or adult stages (3).

47 The northern house mosquito, *Culex pipiens*, is an important vector of mosquito-borne  
48 pathogens such as West Nile virus (WNV) and Saint Louis encephalitis virus (SLEV), and  
49 serves as an important model to understand diapause physiology in insects (3–5).  
50 Evidence suggests that the immature life stages (larvae and pupae) respond to  
51 photoperiod and temperature cues to promote facultative diapause in adult female  
52 mosquitoes following eclosion (6–8), where the resulting females forego blood-feeding  
53 (9, 10) and remain in an arrested reproductive state characterized by small primary  
54 ovarian follicles (3, 11, 12). Additional physiological changes to the cuticle (13, 14) and  
55 reduced diuresis (15) protect against desiccation, while alterations to host metabolism  
56 increase lipid and glycogen storage (16–20) to help sustain overwintering survival.

57 Photoperiod and temperature are long-established components of mosquito facultative  
58 diapause induction, where short day lengths and cool temperatures promote this  
59 physiological state (6, 8). Previous studies with *Cx. pipiens* suggest that day lengths  
60 under 15 hours can elicit the diapause under laboratory conditions using cool  
61 temperatures (18–22°C) (6, 8). Evidence suggests that diapause induction is stronger with  
62 shorter photophases and lower temperatures, where ~100% of a colony can be induced  
63 under 12 hours of day light and at 18°C (6). However, higher temperatures can revert  
64 diapausing individuals or suppress diapause entry, even at lower photophases (5, 7, 21),  
65 demonstrating the combined importance of photoperiod and temperature in defining the  
66 diapause state.

67 Laboratory experiments to induce diapause using a short photoperiod (9:15) and cool  
68 temperature (19°C) have produced significant insights into the hormonal regulation (4,  
69 18, 22, 23) and molecular physiology of *Cx. pipiens* diapause (17, 24–26), yet these

70 experimental conditions in the laboratory do not capture the natural fluctuations in daily  
71 temperature that encompass the realistic end-season conditions that promote diapause  
72 induction. Limited studies have addressed the diapause induction timeline in natural  
73 populations of *Cx. pipiens*. Semi-field experiments in Ontario, Canada, recorded diapause  
74 incidence as early as July, with peak rates in mid-August (21), while field-collected  
75 mosquito samples in Boston, USA revealed low levels of diapause incidence beginning  
76 in mid-August, with peak incidence in late September/early October (27). In addition,  
77 evidence suggests that there is annual variation in diapause induction, with peak periods  
78 of induction varying by approximately two weeks between years (27). Together, this  
79 geographic and yearly variability in diapause incidence highlight our limited understanding  
80 of *Cx. pipiens* diapause under natural conditions.

81 Herein, we perform laboratory and semi-field studies to examine diapause induction in a  
82 laboratory population of *Cx. pipiens*, confirming the requirements of both photoperiod and  
83 temperature on diapause induction, as well as provide temporal evidence of the natural  
84 seasonal conditions that promote diapause in central Iowa, USA. To place these data in  
85 the context of diapause incidence in natural mosquito populations, we leverage gravid  
86 *Cx. pipiens* population data from Iowa and multiple locations across the United States to  
87 serve as a proxy for diapause incidence. These data suggest that temperature, latitude,  
88 elevation, and *Culex* population genetics significantly impact natural diapause ecology.  
89 Together, our data provide significant new insight into the complexity of *Cx. pipiens*  
90 diapause induction and its influence in end-of-season mosquito population trends. These  
91 results have important public health implications for mosquito-borne disease  
92 transmission, and increase our understanding of how a globally changing climate may  
93 extend mosquito activity and influence mosquito overwintering.

## 94 **Results**

### 95 **Diapause induction requires both short day lengths and cool temperatures**

96 With the intention to use a laboratory colony of *Culex pipiens* originally isolated from  
97 Ames, Iowa and maintained for ~16 years in the laboratory (without selection for the  
98 diapause state), we first wanted to demonstrate diapause induction in this *Cx. pipiens*  
99 population through laboratory experiments. To approach this question, we reared *Cx.*

100 *pipiens* from first instar larvae to adults under different laboratory conditions (**Figure 1A**)  
101 to examine the influence of temperature alone (cold; 16:8 L:D, 19°C), photoperiod alone  
102 (dark; 9:15 L:D, 25°C), and the combined effects of temperature and photoperiod  
103 (diapause; 9:15 L:D, 19°C) to promote adult diapause (10, 18, 28).

104 Using arrested ovarian development as a proxy for diapause induction (29), we examined  
105 ovarian follicle length in individual female adult mosquitoes 6-8 days post-eclosion (6, 7)  
106 from each experimental condition (**Figure 1B**). Interestingly, autogenous mosquitoes  
107 (displaying follicle maturation without a blood meal) were detected in all experimental  
108 conditions (**Figure S1**), suggesting that low rates of autogeny exist in our laboratory  
109 colony of *Cx. pipiens*. Across experimental conditions, average follicle size was  
110 comparable under the cold and dark conditions with standard laboratory rearing  
111 conditions (control), yet were significantly reduced under diapause conditions (**Figure**  
112 **1B**). Using a strict follicle size cutoff of  $\leq 50 \mu\text{m}$  to designate individuals in diapause (29),  
113 only the cool temperatures and short photoperiod of the “diapause condition” produced  
114 individuals in the diapause state (**Figure 1B**), as demonstrated by the arrested follicle  
115 morphology in diapausing individuals (**Figure 1C**). This confirms that diapause induction  
116 in our laboratory colony of *Cx. pipiens* requires both short photoperiod and cool  
117 temperatures similar to previous studies (6, 11).

118 Additional previously defined physiological features of diapause (10, 18, 30) were also  
119 explored to further validate diapause induction in our laboratory colony. This includes  
120 increased lipid accumulation (**Figure 1D**) (18, 31), a larger body size (**Figure 1E**) (30) ,  
121 and reduced blood-feeding behavior (**Figure 1F**) (10), which together confirm the  
122 diapause state. Moreover, we demonstrate that our non-diapause rearing conditions can  
123 have additional influence on mosquito physiology, most notably the independent effects  
124 of temperature and short photoperiod on body size (**Figure 1E**), and decreased feeding  
125 behavior under cool temperature conditions (**Figure 1F**).

## 126 **Evaluating natural diapause induction in semi-field experiments**

127 While laboratory studies are required to understand the physiological aspects of mosquito  
128 diapause, the environmental conditions used to promote diapause induction in the

129 laboratory do not accurately depict the natural end-of-season conditions in temperate  
130 climates where temperatures are variable and photoperiods are less extreme than the 9-  
131 hour photoperiod typically used in laboratory studies of mosquito diapause (**Figure 2A**).  
132 In an effort to better understand the natural diapause conditions for *Cx. pipiens*, we  
133 performed a two-year semi-field study in Ames, Iowa, USA (**Figure 2B**) enabling a  
134 structured approach to examine the life history conditions that result in diapause under  
135 natural conditions. To approach this question, we reared *Cx. pipiens* from our laboratory  
136 colony at semi-field locations (**Figure S2**) from first instar larvae to adults at different  
137 timepoints according to epidemiological week from July through late-September (**Figure**  
138 **2B**). Initially in 2020, groups of lab-reared first instar *Cx. pipiens* larvae were placed  
139 outside every three weeks from week 30 to week 39 (July to late-September; **Figure 2B**),  
140 with each group representing an approximate one-hour difference in photoperiod (**Figure**  
141 **S3**) ranging from ~15 to 12 hours of daylight at the onset of larval development. A similar  
142 approach was employed in 2021, with experimental groups deployed at weeks 30, 33,  
143 34, 37, 38, and 39 (**Figure 2B, Figure S3**) to provide further resolution into the natural  
144 diapause induction timeline.

145 To determine which mosquitoes had entered diapause, we examined ovarian follicle size  
146 as in **Figure 1**. In 2020, a total of 193 adult female mosquitoes were examined from four  
147 experimental groups, of which diapause was detected in mosquitoes with a rearing onset  
148 initiated during weeks 36 and 39 (early- and late-September; **Figure 2C, Table S1**).  
149 Similar results were obtained in 2021, where 115 mosquitoes across six experimental  
150 groups were examined, with diapause detected in groups with a rearing onset as early as  
151 week 34 (late August) and increasing in intensity through the remainder of the  
152 experimental timepoints initiated in September (**Figure 2D, Table S1**). For both years,  
153 diapause induction was strongest ( $\geq 50\%$  of mosquitoes in diapause) after week 38 (late-  
154 September; **Figure 2E**), when immature mosquito development occurred with ~12 hours  
155 of daylight and an average temperature of 15°C (**Figure 2F**), yet was readily detected in  
156 groups reared under 13.5 hours of daylight and ~20°C (**Figure 2F**).

157 To further examine this receptive period able to promote diapause induction, we placed  
158 lab-reared pupae under semi-field conditions each week from weeks 36-40 (September

159 to early-October) and evaluated their ability undergo reproductive diapause. While the  
160 transfer of lab-reared pupae to artificial diapause conditions (9:15 L:D, 19°C) results in  
161 nearly 100% diapause induction (6), under our semi-field conditions diapause induction  
162 was inefficient, with diapause only detected in low frequency (6-17%) from pupae placed  
163 outside in weeks 39 and 40 (**Figure S4**). This corresponds to the approximate  
164 environmental conditions in mid-to late-September that result in  $\geq 50\%$  diapause induction  
165 in our larval groups (**Figure 2E**), suggesting that the environmental signals during late-  
166 September may be driving diapause induction in our semi-field conditions. In addition, the  
167 low frequency of diapause induction at the pupal stages is suggestive that the cumulative  
168 exposure over immature developmental stages may enhance diapause induction as  
169 previously suggested (7).

170 Based on our results (**Figure 1**) and other previous studies (6, 11), temperature is an  
171 important, yet complex variable in the context of diapause induction. When examined  
172 between years, there is slight variation in diapause induction (**Figure 2E**), likely the result  
173 of temperature differences shifting the timing of diapause induction between years  
174 (**Figures S3 and S5, Table S1**). In addition, our data highlight the potential importance  
175 of diurnal fluctuations in temperature that occur during periods of diapause receptivity  
176 (**Figure S6**), where daily low temperatures may be able to sustain diapause induction  
177 signals even during the exposure to high daily temperatures ( $>30^\circ\text{C}$ ) in our semi-field  
178 studies that would typically “break” diapause induction (6). Temperature also had a  
179 significant influence on mosquito development and survival as temperatures declined in  
180 late-summer/early-fall. As the season progressed, our experimental groups displayed  
181 increased developmental times, most notably slowing larval and pupal development,  
182 ultimately influencing adult eclosion (**Figure S3**). Moreover, in both years of our semi-  
183 field study, larvae placed outside in late September (weeks 38 and 39) experienced  
184 significant mortality in immature stages due to suboptimal temperatures for mosquito  
185 development and survival, resulting in the low numbers of individual mosquitoes that  
186 contributed to our analysis of reproductive diapause (**Figure 2C** and **Figure 2D**).

187 **Mosquito surveillance data inform diapause induction in Iowa field populations**

188 While our semi-field study provides valuable new insight into the conditions and timing of  
189 natural diapause induction (**Figure 2**), these experiments were performed using a  
190 laboratory-derived population of *Cx. pipiens* and may not fully capture diapause induction,  
191 such that natural field populations of mosquitoes may be more receptive to photoperiod  
192 and temperature. To measure the natural diapause timeline in populations of *Cx. pipiens*,  
193 we utilized long-term mosquito surveillance data from central Iowa to capture adult *Cx.*  
194 *pipiens* population trends in natural field settings.

195 Using different trap types to estimate general mosquito abundance (New Jersey light trap;  
196 NJLT) or blood-fed/reproductive mosquito populations (grass infusion-baited gravid traps;  
197 gravid), we examined *Cx. pipiens* population dynamics in central Iowa (**Figure S7**) from  
198 2016-2021 as a proxy for diapause induction in natural field populations. NJLT data  
199 demonstrate early-season peaks (May/June) in *Culex pipiens* group (32–34) abundance,  
200 which taper mid-summer (July) before a late-season rise in September (**Figure 3A**). In  
201 contrast, gravid *Cx. pipiens* populations peak mid-summer (week 32), then decline by  
202 61% by week 40 (**Figure 3B**). Comparisons of NJLT and gravid population trends using  
203 a linear regression of annual slope values over weeks 30-40 were significant ( $P=0.0079$ ),  
204 supporting that only reproductive gravid *Cx. pipiens* populations are declining during the  
205 late-summer (**Figure S8**). When placed in the context of diapause induction established  
206 in our semi-field experiments (**Figure 2**), gravid adult field populations experience  
207 significant declines during September, corresponding with the approximate  
208 environmental signals able to promote diapause in our semi-field studies. Moreover, the  
209 cessation of mosquito surveillance after week 40 (October) tightly corresponds with the  
210 high rates of diapause in our semi-field groups suggesting that after the beginning of  
211 October most emerging females will be in diapause (**Figure 3B**).

### 212 ***Cx. pipiens* diapause incidence shares similar timelines across the United States**

213 Based on our observations of *Cx. pipiens* diapause induction in semi-field (**Figure 2**) and  
214 natural field conditions in Iowa (**Figure 3**), we wanted to similarly examine potential  
215 diapause timelines across the United States. To approach this question, mosquito  
216 surveillance data was collected from across the country (California, Colorado,



217 Connecticut, Illinois, Minnesota, Pennsylvania, and Virginia) to examine adult *Cx. pipiens*  
218 population dynamics, similar to that described in Iowa (**Figure 3**).

219 For locations with both NJLT and gravid trap types, linear regressions of annual slopes  
220 by trap type confirm that gravid trends were distinct from general population trends (NJLT)  
221 from weeks 30 to 40 at each location (Iowa,  $P < 0.01$ ; California,  $P < 0.001$ ; Colorado,  
222  $P < 0.05$ ; Connecticut,  $P < 0.0001$ ) (**Figure S8**). When historical gravid trapping data were  
223 used to compare end-season (weeks 30-40) across the country, there was a consistent  
224 decline in *Cx. pipiens* gravid populations from mid-summer (July, week 30) to late-  
225 summer/early-fall across the United States (**Figure 4A**), with the exception of gravid  
226 populations from Suffolk, Virginia which displayed a slightly increased trend in *Cx. pipiens*  
227 abundance (**Figure 4A**). These observations coincide with the decline of gravid  
228 populations in Iowa over August and September (**Figure 3**), where gravid populations in  
229 most location undergo notable declines in gravid *Cx. pipiens* populations from week 30  
230 to 40 ranging from ~32 to 90% (**Figure 4B**).

231 Lower latitude sites (Suffolk, Virginia and California) (**Figure S9**) had less pronounced  
232 population declines (and even increased *Cx. pipiens* gravid populations; **Figure 4B**),  
233 highlighting the significant influence ( $R^2 = 0.69$ ,  $P = 0.01$ ) of latitude on end-of-season *Cx.*  
234 *pipiens* dynamics (**Figure 4B**). This coincides with similar effects of latitude and  
235 photoperiod on diapause induction in other insects (35, 36) and mosquito species (37,  
236 38). Moreover, in both Virginia and California, evidence suggests that these regions are  
237 within hybridization zones between *Cx. pipiens* and *Culex quinquefasciatus* (39–41)  
238 (**Figure 4C**), a morphologically identical species that does not undergo diapause (8, 30,  
239 42). As a result, the absence or low incidence of diapause in these locations may be due  
240 to the respective misidentification of *Cx. quinquefasciatus* as *Cx. pipiens*, the  
241 hybridization of these species resulting in intermediate diapause phenotypes (8, 30), or  
242 the potential that these could be populations of *Cx. pipiens* f. *molestus* that do not undergo  
243 reproductive diapause (43).

244 To make comparisons of diapause-relevant environmental factors across sites, average  
245 weekly day length and average temperature values were compiled from each location (or

246 comparably close locations) (**Figure S10**). Temperatures across all study sites noticeably  
247 declined over the 10-week period, with Minnesota (Minneapolis/St. Paul) and Colorado  
248 (Larimer County) having the coldest average temperature (~10 °C) at week 40 (**Figure**  
249 **S9**). Connecticut, Illinois (Chicago), and Pennsylvania displayed comparable average  
250 temperatures (~15 °C) at week 40 (**Figure S10**), similar to the average temperatures in  
251 Iowa at this timepoint (**Figure 2F**). Of note, the two locations (Northern California; Suffolk,  
252 VA) with the smallest changes in gravid trap numbers (**Figure 4B**), which suggest little to  
253 no diapause, had much higher temperatures across the entire 10-week period, with week  
254 40 averages of ~20 °C (**Figure S10**). Although average day lengths varied slightly at the  
255 start (week 30), with the highest latitude location (Minnesota) having slightly longer day  
256 lengths, all included locations converged to near identical levels (~12 hours) by the fall  
257 equinox (week ~38).

258 Our nationwide gravid trap data also allude to the influence of elevation in *Cx. pipiens*  
259 diapause induction, where surveillance data from Colorado display sharp declines in  
260 gravid populations beginning in late-August (week 34) and the termination of surveillance  
261 activities only weeks later (week 37; **Figure 4A**). This accelerated timeline suggests that  
262 the high altitude of Larimer County, CO (**Figure S9**) enhanced the environmental signals  
263 that promote diapause induction, similar to that described in other mosquito species (37,  
264 44).

## 265 **Discussion**

266 Although diapause is a critical component to the success of *Culex pipiens* overwintering  
267 survival in temperate regions, our understanding of the environmental signals that  
268 promote diapause induction under natural conditions has thus far been limited. Using  
269 laboratory and semi-field experiments to inform historical mosquito surveillance trends  
270 from across the county, we provide a definitive diapause induction timeline broadly shared  
271 in true *Cx. pipiens* populations across the United States. While temperature and  
272 photoperiod are integral components of diapause induction in laboratory and field  
273 conditions, our data suggest that latitude and elevation can further amplify the effects of  
274 temperature and photoperiod under natural conditions, as well as highlight the importance  
275 of the influence *Culex* population genetics in defining diapause incidence (**Figure 5**).

276 There are many physiological and behavioral changes associated with diapause (10, 11,  
277 13, 31, 45), yet the key feature to confirm reproductive diapause in *Cx. pipiens* is an  
278 arrested ovarian development phenotype (11, 46, 47). Morphologically this corresponds  
279 to arrested ovarian follicle development, in which follicles lack yolk granulation and  
280 become stunted in size (48). Arrested ovarian development has also been quantified  
281 using either direct measurements of the primary follicle (5, 18, 25, 29, 30), or the size  
282 ratio of the primary follicle to the secondary follicle (6, 42, 46, 49) to establish diapause.  
283 In our experiments, we relied on measurements of the primary follicle to determine  
284 reproductive diapause. Previous experiments have defined diapause using this  
285 methodology with follicle lengths ranging from 30-70  $\mu\text{m}$  (5, 18, 25, 29, 30, 49). However,  
286 our *Cx. pipiens* colony produced primary follicle lengths of  $\sim 75 \mu\text{m}$  in under standard  
287 rearing conditions. As a result, a more conservative cutoff of  $\leq 50 \mu\text{m}$  was used to confirm  
288 reproductive diapause in our lab colony at the risk of potentially excluding some individual  
289 mosquitoes that did not meet these strict criteria in our laboratory and semi-field  
290 experiments.

291 In laboratory experiments using an established colony of *Cx. pipiens*, we observed a  
292 relatively low frequency of diapause induction when we applied our strict criteria for  
293 ovarian arrest. Although diapause is genetically determined [reviewed in 48], our colony  
294 of *Cx. pipiens* has been maintained in artificial laboratory conditions after its initial  
295 colonization ( $\sim 2005$ ) without re-invigoration from wild-caught specimens or artificial  
296 diapause cycling (29). As a result, our laboratory colony may have become desensitized  
297 to the thermal and photoperiod cues required to promote diapause, similar to the influence  
298 of artificial rearing conditions on diapause incidence in other insect species (51, 52). In  
299 addition, our laboratory diapause induction experiments used a fluorescent light source,  
300 which previous studies have suggested is less efficient than incandescent light at  
301 promoting diapause in *Cx. pipiens* (8). While at present we cannot provide a clear  
302 explanation for the low rates of diapause induction in our laboratory experiments, the  
303 same lab colony was used in our semi-field experiments where diapause incidence  
304 reached in excess of 50%, suggesting that the predisposition for diapause remains in our  
305 *Cx. pipiens* colony. Factors such as the length of crepuscular periods, more extreme low

306 daily temperatures, or diurnal temperature fluctuations may be important natural variables  
307 that can overcome diapause de-sensitivity resulting from long-term colonization.

308 While short photoperiod (9:15 L:D) and cool temperatures (19°C) are traditionally used to  
309 initiate diapause in the laboratory (26, 28, 53), these experimental conditions do not  
310 accurately reflect the natural onset of diapause in the field. Photoperiod values only  
311 vaguely provide a timeline of diapause potential between the summer solstice (15 hours  
312 of light) where low-level diapause is possible (6, 21) and the winter solstice (9 hours of  
313 light) where temperatures prove impossible for mosquito survival and development in  
314 temperate climates. Similarly, as temperatures can subvert diapause induction (6), the  
315 potential for natural fluctuations in the end-season may affect presumed diapause  
316 timelines derived from stable lab combinations of photoperiod and temperature. However,  
317 only a limited number of studies have examined *Cx. pipiens* diapause in field or semi-field  
318 settings (21, 27, 49).

319 Through our semi-field studies conducted over a two-year period (2020-2021), we  
320 systematically reared mosquitoes over weeks 30-40 to capture the natural conditions that  
321 promote diapause induction in *Cx. pipiens*. From these experiments, we define a timeline  
322 of brood receptivity to diapause beginning in late-August (week 34) when immature  
323 mosquitoes have the potential to emerge in adult diapause. With increasing diapause  
324 incidence as the season progresses, our data support that there is a critical field  
325 photoperiod in mid-September (week 38) where ~50% of the immature *Cx. pipiens*  
326 population reared at this time emerged in the adult diapause state. This closely coincides  
327 with the results of a previous semi-field study in Boston, USA, where peak diapause  
328 incidence occurred in late September and early October (27). While diapause can be  
329 induced in pupae under artificial diapause conditions (6), the low occurrence of pupal  
330 diapause in our semi-field study during these peak periods of diapause induction  
331 suggests that cumulative environmental signals experienced over all immature stages  
332 may enhance diapause incidence as previously proposed (7).

333 While our semi-field experiments are informative in exploring natural diapause induction,  
334 factors such as the gaps between experimental cohorts and the reliance on a laboratory

335 colony of *Cx. pipiens* are known limitations. To overcome this, we employed the use of  
336 *Cx. pipiens* surveillance data as a proxy for adult diapause incidence (21). Through the  
337 use of a multi-year data set that captured long-term weekly adult abundance, we  
338 demonstrate that gravid female mosquito populations begin to decline in August until they  
339 are effectively depleted by October. Although some of these trends will be in part from  
340 encroaching cold temperatures that reduce blood-feeding behavior, as was demonstrated  
341 in the laboratory, these observations closely align with the natural diapause conditions  
342 defined in our semi-field study. Initially focused on surveillance data from Iowa, additional  
343 data from across the country provided an opportunity to study diapause timelines in a  
344 larger context, where surveillance data at the national scale revealed that latitude,  
345 elevation, and *Culex* population genetics may influence *Culex* diapause incidence in  
346 addition to temperature and photoperiod.

347 When our data are placed in the context of the wide geographic range within the United  
348 States, the importance of latitudinal patterns on diapause incidence begin to emerge for  
349 *Cx. pipiens*, where we identify a gradient in the effects of latitude and elevation on  
350 diapause incidence, similar to that described in mosquito species (37, 44, 54, 55).  
351 Moreover, our data suggest that *Culex* population genetics may also have significant  
352 influence on diapause induction where *Cx. pipiens* hybridization with the morphologically  
353 indistinguishable *Cx. quinquefasciatus* may result in intermediate diapause phenotypes  
354 (30). Together with the potential of non-diapausing *Cx. pipiens* f. *molestus* populations,  
355 the genetics of local *Culex pipiens* s.l. populations may contribute to the absence or low  
356 incidence of diapause in a given location, where only genetically pure populations of *Cx.*  
357 *pipiens pipiens* enter reproductive diapause (6, 49). However, only limited studies have  
358 examined *Cx. pipiens* s.l. population genetics in the United States (39, 56–62),  
359 highlighting the important need to better define these important vector species. Of note,  
360 few pure *Cx. pipiens pipiens* were detected in northern California (57, 63), which may  
361 account for the weak population declines observed in the gravid trap data from California.  
362 This coincides with previous observations in northern California that *Cx. pipiens* s.l. do  
363 not enter diapause (49). The population genetics of *Cx. pipiens* s.l. in Virginia have not  
364 been previously examined, yet due to the geographic location, there is likely hybridization

365 within the *Cx. pipiens* complex that may similarly partially account for the observations in  
366 the gravid trap data.

367 Although temperature is considered an important signal for diapause induction, its  
368 contributions to diapause have primarily been evaluated under stable conditions in the  
369 laboratory, with little insight into weekly temperature variability and daily temperature  
370 fluctuations that occur in nature. As a result, identifying periods of diapause-receptivity to  
371 temperature alone is difficult, especially when temperature can influence *Culex* species  
372 immature development times (64, 65), as well as adult survival, blood-feeding, and  
373 fecundity (65). Similar to these experiments, we observed extended larval development  
374 times with cooler average temperatures, which may allow for the increased accumulation  
375 of lipids in subsequent diapausing adults (18). However, as temperatures continue to drop  
376 in late-summer and early-fall when developing larvae can emerge in diapause, there is a  
377 tight balance between accumulating enough resources to enter diapause and not being  
378 able to survive temperatures that do not allow for further development. As such,  
379 temperature can be a highly confounding variable, one that likely accounts for small  
380 variations in the timing of diapause induction between years.

381 An additional, often overlooked aspect of temperature is the influence of daily temperature  
382 fluctuations on mosquito physiology. In *Aedes aegypti*, large diurnal temperature ranges  
383 negatively impact mosquito development (66), adult female fecundity (66), and vector  
384 competence (67). Given that diurnal temperature ranges are largest in temperate climates  
385 during the late-summer and early-fall when mosquitoes are receptive to diapause, we  
386 hypothesize that these daily temperature fluctuations may similarly influence *Culex*  
387 physiology and diapause induction. Moreover, daily temperature fluctuations may protect  
388 the commitment to diapause if diapausing adults are exposed to higher temperatures that  
389 would regularly break reproductive diapause under laboratory conditions (5).

390 Although long inferred, the relationship of diapause induction to the cessation of West  
391 Nile virus (WNV) activity has yet to be fully explored. Our data provide strong support that  
392 the diapause incidence in the late-summer/early-fall coincides with the dramatic decline  
393 of human WNV cases and mosquito infection rates in late-September and early-October

394 in temperate regions of the United States (32, 68, 69). Moreover, since diapausing  
395 females do not blood feed (10), it argues that the overwintering of WNV in *Cx. pipiens*  
396 (70–73) occurs via vertical transmission as previously suggested (74, 75). Coincidentally,  
397 the period of diapause receptivity in the late-summer and early-fall also corresponds the  
398 peak of WNV mosquito infection rates (32). Although vertical transmission is an inefficient  
399 process (70–73), the increased prevalence of WNV infection in mosquito populations  
400 during the approximate time when conditions are favorable for diapause induction may  
401 enhance WNV overwintering in diapausing female mosquitoes. As a result, measures to  
402 control *Culex* populations prior to diapause induction may not only reduce mosquito  
403 populations in the following spring as previously suggested (76), but also limit WNV  
404 overwintering and subsequent disease burdens in the following season.

405 In summary, our findings provide a definitive examination of diapause induction in *Cx.*  
406 *pipiens* supported by laboratory, semi-field, and field-collected surveillance data from  
407 across the United States. We demonstrate the dynamic nature of diapause ecology  
408 influenced by yearly variation in temperature, as well as the effects of latitude, elevation,  
409 and mosquito population genetics that ultimately determine the overall end-season  
410 population structure of *Cx. pipiens* and its role in WNV transmission. Taken together,  
411 these data demonstrate the importance of mosquito diapause in defining periods of  
412 mosquito-borne disease transmission in the United States. With evidence suggesting that  
413 rising global temperatures can alter diapause incidence (77), the effects of climate change  
414 may extend transmission seasons and increase the incidence of mosquito-borne disease  
415 in temperate regions throughout the world (77–79).

## 416 **Materials and methods**

### 417 *Mosquito rearing*

418 A laboratory colony of *Cx. pipiens* mosquitoes originally isolated from field collections in  
419 Ames, Iowa has been constantly maintained in Iowa State University's Insectary at 25 °C,  
420 85% RH, and 16:8 (L:D) on 10% sucrose *ad libitum* since approximately 2005. Larvae  
421 were fed using a 50/50 mix of crushed Milk-Bone® and Tetramin® fish food, while  
422 commercial sheep blood (Hemostat Laboratories) was used for egg production.

423 *Laboratory diapause induction experiments*

424 Laboratory experiments to examine diapause induction were performed by placing newly  
425 hatched first instar mosquitoes in Percival incubators where they were reared under  
426 different experimental conditions (*Control*: 25°C, 16:8 (L:D); *Cold*: 19°C, 16:8 (L:D); *Dark*:  
427 25°C, 9:15 (L:D); *Diapause*: 19°C, 9:15 (L:D)) to examine the independent and combined  
428 influence of temperature and photoperiod on diapause induction. Experimental conditions  
429 were selected based on previous studies (10, 26, 30) in which diapause was induced by  
430 a short photoperiod (9:15) and cool temperatures (19°C).

431 *Confirmation of reproductive diapause*

432 Ovaries were dissected from females aged 6-8 days in 1% PBS solution and mounted  
433 with Aqua-Poly/Mount (Polysciences Inc). To confirm reproductive diapause, primary  
434 follicle lengths were measured under 200x magnification using an Olympus BX40  
435 compound microscope according to ovary morphology as previously defined (28, 29). Ten  
436 measurements per ovary were recorded to calculate an average follicle length per  
437 individual. Individuals with average follicle size under 50 µm were defined as being in  
438 diapause (29).

439 *Wing length measurements*

440 Measurements of wing length served as a proxy for mosquito body size (80, 81), where  
441 the right wing was dissected and measured from the alula to the most distal tip of the wing  
442 under 10x magnification using a dissecting microscope and Nikon imaging software (NIS  
443 Elements D 3.2).

444 *Blood-feeding behavior*

445 Approximately 20-30 adult females (6-8 days post-eclosion) from each experimental  
446 rearing condition as described above, were challenged with defibrinated sheep blood  
447 (Hemostat Laboratories) using an artificial membrane system. After approximately one  
448 hour, the number of mosquitoes with a visible blood meal were recorded (of the total) to  
449 calculate the percentage of mosquitoes taking a blood meal. Experiments were performed  
450 in three independent biological experiments.

451 *Lipid staining*



452 Nile Red (Thermo Fisher Scientific) was used to visualize differences in lipid stores of  
453 adult females (6-9 days old) reared under diapause (19 °C, 9:15 L:D) and control  
454 conditions (25 °C, 16:8 L:D). Fat bodies were dissected in 4% paraformaldehyde, and  
455 stained using a 1:100 PBS dilution of 500 µg/ml Nile Red powder in acetone stock as  
456 previously described (18, 31). After incubating tissues for 10 minutes, samples were  
457 imaged using a Nikon 50i fluorescent microscope and processed with Nikon imaging  
458 software (NIS Elements D 3.2).

#### 459 *Semi-field studies of diapause induction*

460 To examine diapause induction in a natural setting, first instar larvae from our laboratory  
461 colony were placed at three locations in Ames, Iowa in 2020 and two locations in 2021  
462 (**Figure S2**) to mimic the emergence of mosquito populations at different timepoints  
463 throughout the season. In 2020, batches were placed outside every three weeks  
464 according to epidemiological week, from week 30 (July 19th) to week 39 (September  
465 20th), approximately corresponding to a one-hour loss in daylight between each group.  
466 In 2021, batches were again placed outside at weeks 30, 33, and 39 to replicate  
467 experiments from the previous year. Unfortunately, larvae were not available to repeat  
468 the week 36 timepoint in 2021, however additional groups were included from weeks 34,  
469 37, and 38 to provide additional resolution to diapause induction. Larval density in each  
470 batch was approximately 300-400 per tray in 1L of distilled water. Mosquitoes were fed  
471 daily with 50 mg of a 50/50 mixture of Milk-Bone® mix and Tetramin® fish food. Upon  
472 pupation, pupae were placed into mosquito breeder eclosion chambers (BioQuip), with  
473 adults were provided with 10% sucrose *ad libitum* for 6-8 days before collections to  
474 determine diapause incidence. In addition, lab-reared pupae were placed outside in  
475 mosquito breeder eclosion chambers in 2021 from weeks 37-40 to compare diapause  
476 induction rates between mosquito life stages.

#### 477 *Mosquito population trends in Iowa*

478 Mosquito surveillance was performed in two central Iowa counties (Polk, Story) by Iowa  
479 State University personnel or local public health partners from mid-May (week 20) through  
480 the first week of October (week 40). Mosquito collections were performed using infusion-  
481 baited Frommer Updraft Gravid Traps (John W. Hock Company) targeting gravid adult

482 female mosquitoes at 16 sites over a six-year period (2016-2021; **Figure S6**). In addition,  
483 a total of 14 New Jersey light traps (NJLTs) were used to measure mosquito abundance  
484 (2016-2021). Trapping sites (gravid or NJLT) with less than three years of mosquito data  
485 were excluded from the study. All mosquito samples were identified using morphological  
486 keys (40, 82) where possible. Due to damage to morphological features that help to define  
487 *Culex* species (83), mosquito identifications of *Culex pipiens* and *Culex restuans* from  
488 NJLT traps were defined as *Culex pipiens* group as previously (32, 34). Gravid trap  
489 specimens were identified to species (*Culex pipiens*) (82). To normalize trapping efforts,  
490 raw mosquito counts were converted to a trap index (defined as  
491 the number of mosquitoes collected / number of trapping nights) and then averaged by  
492 week.

#### 493 *Iowa Climate and Photoperiod data*

494 Daily temperature data (°C) was collected and averaged into weekly values by year using  
495 the Iowa Environmental Mesonet (<https://mesonet.agron.iastate.edu>) for the Southeast  
496 Ames station (IA0203). Photoperiod data for the duration of the study period was collected  
497 as hours of daylight for Des Moines, Iowa from daylight tables provided from an online  
498 Sunrise and Sunset table ([www.timeanddate.com](http://www.timeanddate.com)).

#### 499 *National trends in diapause induction, temperature, and Culex species hybridization*

500 Mosquito surveillance data were provided from additional locations across the United  
501 States (California; <https://vectorsurv.org/>, Colorado, Connecticut, Illinois, Minnesota,  
502 Pennsylvania, and Virginia) representing the temperate range of *Cx. pipiens* in the United  
503 States (40). The years included from each data set are as follows: California (2005-2020),  
504 Colorado (2015-2020), Connecticut (2006-2020), Illinois (2016-2020), Minnesota (2016-  
505 2020), Pennsylvania (2007-2017), and Virginia (2010-2020). To reflect the end-of-season  
506 population trends, data was trimmed to reflect weeks 30-40 where applicable (Colorado  
507 ends at week 37, Chicago ended most weeks at 39), with raw mosquito counts normalized  
508 using trap index averages to account for differences in trapping efforts (number of  
509 mosquitoes / numbers of trapping nights) as previously performed for the Iowa dataset.  
510 Data from Illinois and Minnesota represents *Culex pipiens* group (a combination of the

511 morphologically similar *Culex restuans* and *Cx. pipiens* species) (32, 33), while records  
512 from other states were morphologically identified as *Cx. pipiens*.

513 Daily high and low temperatures for all site locations were compiled using the Iowa  
514 Environmental Mesonet (<https://mesonet.agron.iastate.edu>). All locations reflect 10-year  
515 averages (2010-2020) where environmental data were paired to trapping locations as  
516 follows: California (Sacramento, CATSAC), Connecticut (statewide average, CT0000),  
517 Colorado (east Fort Collins, CO3006), Illinois (Chicago O'Hare International airport,  
518 ILTORD), Minnesota (Minneapolis-St. Paul, MNTMSP), Pennsylvania (southeastern PA,  
519 PAC003), and Virginia (Suffolk, VA8192). Photoperiod data was collected from an online  
520 Sunrise and Sunset table ([www.timeanddate.com](http://www.timeanddate.com)) for field locations in California  
521 (Sacramento), Colorado (Fort Collins), Connecticut (New Haven), Illinois (Chicago),  
522 Minnesota (Minneapolis), Pennsylvania (Philadelphia), and Virginia (Chesapeake) for  
523 2021.

524 Elevation data for all site locations are provided as a county-level average value collected  
525 using <https://en-gb.topographic-map.com/>.

526 The proposed ranges of *Cx. pipiens* and *Culex quinquefasciatus*, as well as proposed  
527 areas of hybridization, were created in ArcGIS, adapted from Darsie and Ward (40).

### 528 *Data and Statistical Analyses*

529 Laboratory comparisons comparing ovarian follicle size, wing length, and the percent  
530 blood-feeding across experimental groups were analyzed using a one-way ANOVA with  
531 a Tukey post-hoc analysis using GraphPad Prism 7.0. Average weekly temperature data  
532 were visualized using loess smoothing in R (version 3.6.3). Gravid and NJLT population  
533 trends for weeks 30-40 were examined for the Iowa dataset and other locations where  
534 NJLT data was provided using yearly slope values and negative binomial regressions  
535 with an unpaired *t*-test to demonstrate significant differences in the dynamics of gravid  
536 populations. Mosquito population trends were also evaluated by calculating the difference  
537 in the average trap index at weeks 30-33 and week 40, and displaying these trends as a  
538 percent change  $((\text{week40} - \text{week 30-33}) / \text{week 30-33}) \times 100$  value to demonstrate

539 changing temporal trends in gravid populations from mid-season to end-season time  
540 points.

## 541 **Acknowledgements**

542 We would like to thank Julie Coughlin of the Iowa Department of Public Health and the  
543 many local public health partners that contributed to our mosquito trapping efforts. We  
544 would like to thank Dr. Philip Dixon for assistance in our statistical analysis, Dr. James  
545 Klimavicz for coding and statistics help, and Dr. Ryan Tokarz for creating the initial map  
546 of *Culex* species distributions. Data from California were provided through CalSurv data  
547 request #48 (<https://vectorsurv.org>). This research was supported by the USDA National  
548 Institute of Food and Agriculture, Hatch Project 101071, the Epidemiology and Laboratory  
549 Capacity for Infectious Diseases (ELC) Program through the Iowa Department of Public  
550 Health, and the Midwest Center of Excellence for Vector-Borne Disease. This publication  
551 was supported by Cooperative Agreement #U01 CK000505, funded by the Centers for  
552 Disease Control and Prevention. CMB acknowledges support from the Pacific Southwest  
553 Center of Excellence in Vector-Borne Diseases funded by the U.S. Centers for Disease  
554 Control and Prevention (#1U01CK000516). Its contents are solely the responsibility of the  
555 authors and do not necessarily represent the official views of the Centers of Disease  
556 Control and Prevention or the Department of Health and Human Services.

## 557 **References**

- 558 1. M. J. Way, B. Hopkins, P. M. Smith, Photoperiodism and diapause in insects.  
559 *Nature* **164**, 615 (1949).
- 560 2. S. Beck, Photoperiod induction of diapause in an insect. *Biol. Bull.* **122**, 1–12  
561 (1962).
- 562 3. D. L. Denlinger, P. A. Armbruster, Mosquito Diapause. *Annu. Rev. Entomol* **59**, 73–  
563 93 (2014).
- 564 4. J. Readio, M. H. Chen, R. Meola, Juvenile hormone biosynthesis in diapausing and  
565 nondiapausing *Culex pipiens* (Diptera: Culicidae). *J. Med. Entomol.* **36**, 355–60  
566 (1999).
- 567 5. B. F. Eldridge, C. L. Bailey, Experimental hibernation studies in *Culex pipiens*  
568 (Diptera: Culicidae): reactivation of ovarian development and blood-feeding in  
569 prehibernating females. *J Med Entomol* **15**, 462–467 (1979).
- 570 6. A. Spielman, J. Wong, Environmental control of ovarian diapause in *Culex pipiens*.  
571 *Ann. Entomol. Soc. Am.* **66**, 905–907 (1973).
- 572 7. L. L. Sanburg, J. R. Larsen, Effect of photoperiod and temperature on ovarian  
573 development in *Culex pipiens pipiens*. *J. Insect Physiol.* **19**, 1173–1190 (1973).
- 574 8. B. F. Eldridge, The effect of temperature and photoperiod on blood-feeding and  
575 ovarian development in mosquitoes of the *Culex pipiens* complex. *Am. J. Trop.*  
576 *Med. Hyg.* **17**, 133–140 (1968).
- 577 9. M. F. Bowen, Patterns of sugar feeding in diapausing and nondiapausing *Culex*  
578 *pipiens* (Diptera: Culicidae) females. *J. Med. Entomol.* **29**, 843–849 (1992).
- 579 10. R. M. Robich, D. L. Denlinger, Diapause in the mosquito *Culex pipiens* evokes a  
580 metabolic switch from blood feeding to sugar gluttony. *Proc. Natl. Acad. Sci. U. S.*  
581 *A.* **102**, 15912–15917 (2005).
- 582 11. B. F. Eldridge, Environmental control of ovarian development in mosquitoes of the  
583 *Culex pipiens* Complex. *Am. Assoc. Adv. Sci.* **151**, 826–828 (1966).
- 584 12. A. B. Vinogradova, *Culex Pipiens Pipiens Mosquitoes: Taxonomy, Distribution,*  
585 *Ecology, Physiology, Genetics, Applied Importance and Control*, S. I. Golovatch,  
586 Ed. (Pensoft, 2000).
- 587 13. J. B. Benoit, D. L. Denlinger, Suppression of water loss during adult diapause in the  
588 northern house mosquito, *Culex pipiens*. *J. Exp. Biol.* **210**, 217–226 (2007).
- 589 14. A. Li, D. L. Denlinger, Pupal cuticle protein is abundant during early adult diapause  
590 in the mosquito *Culex pipiens*. *J. Med. Entomol. J. Med. Entomol* **46**, 1382–1386

- 591 (2009).
- 592 15. L. Yang, D. L. Denlinger, P. M. Piermarini, The diapause program impacts renal  
593 excretion and molecular expression of aquaporins in the northern house mosquito,  
594 *Culex pipiens*. *J. Insect Physiol.* (2017)
- 595 16. B. King, S. Li, C. Liu, S. J. Kim, C. Sim, Suppression of glycogen synthase  
596 expression reduces glycogen and lipid storage during mosquito overwintering  
597 diapause. *J. Insect Physiol.* **120**, 103971 (2020).
- 598 17. C. Sim, D. L. Denlinger, Transcription profiling and regulation of fat metabolism  
599 genes in diapausing adults of the mosquito *Culex pipiens*. *Physiol. Genomics* **39**,  
600 202–209 (2009).
- 601 18. C. Sim, D. L. Denlinger, Insulin signaling and FOXO regulate the overwintering  
602 diapause of the mosquito *Culex pipiens*. *Proc. Natl. Acad. Sci.* **105**, 6777–6781  
603 (2008).
- 604 19. G. Zhou, R. L. Miesfeld, Energy metabolism during diapause in *Culex pipiens*  
605 mosquitoes. *J. Insect Physiol.* **55**, 40–46 (2009).
- 606 20. J. Chang, *et al.*, Solid-state NMR reveals differential carbohydrate utilization in  
607 diapausing *Culex pipiens*. *Sci. Rep.* **6**, 37350 (2016).
- 608 21. D. J. Madder, G. A. Surgeoner, B. V. Helson, Induction of diapause in *Culex pipiens*  
609 and *Culex restuans* (diptera: culicidae) in Southern Ontario. *Can. Entomol.* **115**,  
610 877–883 (1983).
- 611 22. A. Spielman, Effect of synthetic juvenile hormone on ovarian diapause of *Culex*  
612 *pipiens* mosquitoes. *J. Med. Entomol.* **11**, 223–225 (1974).
- 613 23. C. Sim, D. L. Denlinger, Insulin signaling and the regulation of insect diapause.  
614 *Front. Physiol.* **4 JUL**, 1–10 (2013).
- 615 24. R. M. Robich, J. P. Rinehart, L. J. Kitchen, D. L. Denlinger, Diapause-specific gene  
616 expression in the northern house mosquito, *Culex pipiens* L., identified by  
617 suppressive subtractive hybridization. *J. Insect Physiol.* **53**, 235–245 (2007).
- 618 25. C. Sim, D. S. Kang, S. Kim, X. Bai, D. L. Denlinger, Identification of FOXO targets  
619 that generate diverse features of the diapause phenotype in the mosquito *Culex*  
620 *pipiens*. *Proc. Natl. Acad. Sci.*, 201502751 (2015).
- 621 26. D. S. Kang, M. A. Cotten, D. L. Denlinger, C. Sim, Comparative transcriptomics  
622 reveals key gene expression differences between diapausing and non-diapausing  
623 adults of *Culex pipiens*. *PLoS One* **11**, 1–14 (2016).
- 624 27. A. Spielman, Structure and seasonality of nearctic *Culex pipiens* populations. *Ann.*  
625 *N. Y. Acad. Sci.* **951**, 220–234 (2001).

- 626 28. D. P. Wilton, G. C. Smith, Ovarian diapause in three geographic strains of *Culex*  
627 *pipiens* (Diptera: Culicidae). *J. Med. Entomol.* **22**, 524-8 (1985).
- 628 29. B. F. Eldridge, "Diapause and related phenomena in *Culex* mosquitoes: Their  
629 relation to arbovirus disease ecology" in *Current Topics in Vector Research*, 1-28  
630 (1987).
- 631 30. M. E. Meuti, C. A. Short, D. L. Denlinger, Mom matters: Diapause characteristics of  
632 *Culex pipiens-Culex quinquefasciatus* (Diptera: Culicidae) hybrid mosquitoes. *J.*  
633 *Med. Entomol.* **52**, 131–137 (2015).
- 634 31. C. Zhang, *et al.*, Understanding the regulation of overwintering diapause molecular  
635 mechanisms in *Culex pipiens pallens* through comparative proteomics. *Sci. Rep.* **9**,  
636 6485 (2019).
- 637 32. B. M. Dunphy, *et al.*, Long-term surveillance defines spatial and temporal patterns  
638 implicating *Culex tarsalis* as the primary vector of West Nile virus. *Sci. Rep.* **9**, 6637  
639 (2019).
- 640 33. B. M. Dunphy, W. A. Rowley, L. C. Bartholomay, A Taxonomic Checklist of the  
641 Mosquitoes of Iowa. *J. Am. Mosq. Control Assoc.* **30**, 119–121 (2014).
- 642 34. Y. Sucaet, J. Van Hemert, B. Tucker, L. C. Bartholomay, A web-based relational  
643 database for monitoring and analyzing mosquito population dynamics. *J. Med.*  
644 *Entomol.* **45**, 775–84 (2008).
- 645 35. S. F. Ryan, P. Valella, G. Thivierge, M. L. Aardema, J. M. Scriber, The role of  
646 latitudinal, genetic and temperature variation in the induction of diapause of *Papilio*  
647 *glaucus* (Lepidoptera: Papilionidae). *Insect Sci.* **25**, 328–336 (2018).
- 648 36. L. Huang, *et al.*, Diapause incidence and critical day length of Asian corn borer  
649 (*Ostrinia furnacalis*) populations exhibit a latitudinal cline in both pure and hybrid  
650 strains. *J. Pest Sci.* **93**, 559–568 (2020).
- 651 37. W. E. Bradshaw, Geography of photoperiodic response in diapausing mosquito.  
652 *Nature* **262**, 384–386 (1976).
- 653 38. W. E. Bradshaw, L. P. Lounibos, Evolution of dormancy and its photoperiodic  
654 control in pitcher-plant mosquitoes. *Evolution* **31**, 546–567 (1977).
- 655 39. L. Kothera, E. M. Zimmerman, C. M. Richards, H. M. Savage, Microsatellite  
656 characterization of subspecies and their hybrids in *Culex pipiens* complex (Diptera:  
657 culicidae) mosquitoes along a North-South transect in the central United States. *J.*  
658 *Med. Entomol.* **46**, 236–248 (2009).
- 659 40. R. F. R. Darsie, R. A. R. Ward, *Identification and geographical distribution of the*  
660 *mosquitoes of North America, North of Mexico*. (University Press of Florida, 2005).

- 661 41. S. Huang, G. Molaei, T. G. Andreadis, Reexamination of *Culex pipiens* hybridization  
662 zone in the eastern United States by ribosomal DNA-based single nucleotide  
663 polymorphism markers. *Am. J. Trop. Med. Hyg.* **85**, 434–441 (2011).
- 664 42. W. K. Reisen, Overwintering Studies on *Culex tarsalis* (Diptera: Culicidae) in Kern  
665 County, California: Life Stages Sensitive to Diapause Induction Cues. *Ann.*  
666 *Entomol. Soc. Am.* **79**, 674–676 (1986).
- 667 43. Y. Haba, L. McBride, Origin and status of *Culex pipiens* mosquito ecotypes. *Curr.*  
668 *Biol.* **32**, R237–R246 (2022).
- 669 44. C. M. Holzapfel, W. E. Bradshaw, Geography of larval dormancy in the tree-hole  
670 mosquito, *Aedes triseriatus* (Say). *Can. J. Zool.* **59**, 1014–1021 (1981).
- 671 45. J. P. Rinehart, R. M. Robich, D. L. Denlinger, Enhanced cold and desiccation  
672 tolerance in diapausing adults of *Culex pipiens*, and a role for Hsp70 in response  
673 to cold shock but not as a component of the diapause program. *J. Med. Entomol.*  
674 **43**, 713–722 (2006).
- 675 46. A. Faraji, R. Gaugler, Experimental host preference of diapause and non-diapause  
676 induced *Culex pipiens pipiens* (Diptera: Culicidae). *Parasit. Vectors* **8**, 389 (2015).
- 677 47. R. K. Washino, The physiological ecology of gonotrophic dissociation and related  
678 phenomena in mosquitoes. *J. Med. Entomol.* **13**, 381–388 (1977).
- 679 48. S. Christophers, The development of the egg follicle in Anophelines. *Paludism* **1**,  
680 73–88 (1911).
- 681 49. B. M. Nelms, P. A. Macedo, L. Kothera, H. M. Savage, W. K. Reisen, Overwintering  
682 biology of *Culex* (Diptera: Culicidae) mosquitoes in the Sacramento Valley of  
683 California. *J. Med. Entomol.* **50**, 773–90 (2013).
- 684 50. D. F. A. Diniz, C. M. R. De Albuquerque, L. O. Oliva, M. A. V. De Melo-Santos, C.  
685 F. J. Ayres, Diapause and quiescence: Dormancy mechanisms that contribute to  
686 the geographical expansion of mosquitoes and their evolutionary success.  
687 *Parasites and Vectors* **10**, 1–13 (2017).
- 688 51. J. G. Kingsolver, A. Nagle, Evolutionary divergence in thermal sensitivity and  
689 diapause of field and laboratory populations of *Manduca sexta*. *Physiol. Biochem.*  
690 *Zool.* **80**, 473–479 (2007).
- 691 52. C. S. Brent, D. W. Spurgeon, Diapause response of laboratory reared and native  
692 *lygus hesperus* knight (Hemiptera: Miridae). *Environ. Entomol.* **40**, 455–461 (2011).
- 693 53. J. P. Rinehart, G. D. Yocum, R. A. Leopold, R. M. Robich, Cold Storage of *Culex*  
694 *pipiens* in the absence of diapause. *J. Med. Entomol.* **47**, 1071–1076 (2014).
- 695 54. D. A. Focks, S. B. Linda, G. B. Craig Jnr, W. A. Hawley, C. B. Pumpuni, *Aedes*



- 696 albopictus (Diptera: Culicidae): A statistical model of the role of temperature,  
697 photoperiod, and geography in the induction of egg diapause. *J. Med. Entomol.* **31**,  
698 278–286 (1994).
- 699 55. J. Urbanski, *et al.*, Rapid adaptive evolution of photoperiodic response during  
700 invasion and range expansion across a climatic gradient. *Am. Nat.* **179**, 490–500  
701 (2012).
- 702 56. L. Kothera, M. S. Godsey, M. S. Doyle, H. M. Savage, Characterization of *Culex*  
703 *pipiens* Complex (Diptera: Culicidae) Populations in Colorado, USA Using  
704 Microsatellites. *PLoS One* **7**, 0047602 (2012).
- 705 57. L. Kothera, B. M. Nelms, W. K. Reisen, H. M. Savage, Population genetic and  
706 admixture analyses of *Culex pipiens* complex (Diptera: Culicidae) populations in  
707 California, United States. *Am. J. Trop. Med. Hyg.* **89**, 1154–1167 (2013).
- 708 58. L. Kothera, *et al.*, Bloodmeal, host selection, and genetic admixture analyses of  
709 *Culex pipiens* complex (Diptera: Culicidae) mosquitoes in Chicago, IL. *J. Med.*  
710 *Entomol.* **57**, 78–87 (2020).
- 711 59. S. Huang, G. Molaei, T. G. Andreadis, Genetic insights into the population structure  
712 of *Culex pipiens* (Diptera: Culicidae) in the Northeastern United States by using  
713 microsatellite analysis. *Am J Trop Med Hyg* **79**, 518–27 (2008).
- 714 60. A. R. Barr, The Distribution of *Culex P. Pipiens* and *CP Quinquefasciatus* in North  
715 America<sup>1</sup>. *Am. J. Trop. Med. Hyg.* **6**, 153–165 (1957).
- 716 61. W. G. Iltis, “Biosystematics of the *Culex pipiens* complex in Northern California.”  
717 (1966).
- 718 62. S. Urbanelli, F. Silvestrini, W. K. Reisen, E. De Vito, L. Bullini, Californian hybrid  
719 zone between *Culex pipiens pipiens* and *Cx. p. quinquefasciatus* revisited (Diptera:  
720 Culicidae). *J. Med. Entomol.* **34**, 116–127 (1997).
- 721 63. B. M. Nelms, *et al.*, Phenotypic variation among *Culex pipiens* complex (Diptera:  
722 Culicidae) populations from the Sacramento Valley, California: Horizontal and  
723 vertical transmission of West Nile virus, diapause potential, autogeny, and host  
724 selection. *Am. J. Trop. Med. Hyg.* **89**, 1168–1178 (2013).
- 725 64. B. L. Dodson, L. D. Kramer, J. L. Rasgon, Effects of larval rearing temperature on  
726 immature development and West Nile virus vector competence of *Culex tarsalis*.  
727 *Parasit. Vectors* **5**, 199 (2012).
- 728 65. A. T. Ciota, A. C. Matarachiero, A. Marm Kilpatrick, L. D. Kramer, The effect of  
729 temperature on life history traits of *Culex* mosquitoes. *J Med Entomol* **51**: 55–62  
730 (2014).
- 731 66. L. B. Carrington, S. N. Seifert, N. H. Willits, L. Lambrechts, T. W. Scott, Large

- 732 diurnal temperature fluctuations negatively influence *Aedes aegypti* (Diptera:  
733 Culicidae) life-history traits. *J. Med. Entomol.* **50**, 43–51 (2013).
- 734 67. L. Lambrechts, *et al.*, Impact of daily temperature fluctuations on dengue virus  
735 transmission by *Aedes aegypti*. *Proc. Natl. Acad. Sci.* **108**, 7460–7465 (2011).
- 736 68. S. Karki, W. M. Brown, J. Uelmen, M. O'Hara Ruiz, R. L. Smith, The drivers of West  
737 Nile virus human illness in the Chicago, Illinois, USA area: Fine scale dynamic  
738 effects of weather, mosquito infection, social, and biological conditions. *PLoS One*  
739 **15**, 1–19 (2020).
- 740 69. T. G. Andreadis, J. F. Anderson, C. R. Vossbrinck, A. J. Main, Epidemiology of  
741 West Nile virus in Connecticut: A five-year analysis of mosquito data 1999–2003.  
742 *Vector-Borne Zoonotic Dis.* **4**, 360–378 (2004).
- 743 70. J. F. Anderson, A. J. Main, Importance of vertical and horizontal transmission of  
744 West Nile virus by *Culex pipiens* in the northeastern United States. *J. Infect. Dis.*  
745 **194**, 1577–1579 (2006).
- 746 71. R. S. Nasci, *et al.*, West Nile virus in overwintering culex mosquitoes, New York  
747 City, 2000. *Emerg. Infect. Dis.* **7**, 742–744 (2001).
- 748 72. H. Kampen, B. A. Tews, D. Werner, First evidence of west nile virus overwintering  
749 in mosquitoes in Germany. *Viruses* **13**, 1–7 (2021).
- 750 73. A. Farajollahi, *et al.*, Detection of West Nile viral RNA from an overwintering pool of  
751 *Culex pipiens pipiens* (Diptera: Culicidae) in New Jersey, 2003. *J. Med. Entomol.*  
752 **42**, 490–494 (2005).
- 753 74. S. Baqar, C. G. Hayes, J. R. Murphy, D. M. Watts, Vertical transmission of West  
754 Nile virus by *Culex* and *Aedes* species mosquitoes. *Am. J. Trop. Med. Hyg.* **48**,  
755 757–762 (1993).
- 756 75. B. R. Miller, *et al.*, First field evidence for natural vertical transmission of West Nile  
757 virus in *Culex univittatus* complex mosquitoes from Rift Valley Province, Kenya.  
758 *Am. J. Trop. Med. Hyg.* **62**, 240–246 (2000).
- 759 76. C. S. Peffers, L. W. Pomeroy, M. E. Meuti, Critical photoperiod and its potential to  
760 predict mosquito distributions and control medically important pests. *J. Med.*  
761 *Entomol.* **58**, 1610–1618 (2021).
- 762 77. W. E. Bradshaw, C. M. Holzapfel, Genetic shift in photoperiodic response  
763 correlated with global warming. *Proc. Natl. Acad. Sci. U. S. A.* **98**, 14509–14511  
764 (2001).
- 765 78. P. Reiter, Dengue, Climate Change and. *Environ. Health Perspect.* **109**, 141–161  
766 (2001).

- 767 79. F. J. Colón-González, *et al.*, Projecting the risk of mosquito-borne diseases in a  
768 warmer and more populated world: a multi-model, multi-scenario intercomparison  
769 modelling study. *Lancet Planet. Heal.* **5**, e404–e414 (2021).
- 770 80. A. M. G. Barreaux, C. M. Stone, P. Barreaux, J. C. Koella, The relationship between  
771 size and longevity of the malaria vector *Anopheles gambiae* (s.s.) depends on the  
772 larval environment. *Parasites and Vectors* **11** (2018).
- 773 81. E. Van Handel, J. F. Day, Correlation between wing length and protein content of  
774 mosquitoes. *J. Am. Mosq. Control Assoc.* **5**, 180–182 (1989).
- 775 82. L. Ferreira-De-Freitas, N. B. Thrun, B. J. Tucker, L. Melidosian, L. C. Bartholomay,  
776 An evaluation of characters for the separation of two *Culex* species (diptera:  
777 culicidae) based on material from the upper midwest. *J. Insect Sci.* **20** (2020).
- 778 83. L. C. Harrington, R. L. Poulson, Considerations for Accurate Identification of Adult  
779 *Culex restuans* (Diptera: Culicidae) in Field Studies. *J. Med. Entomol.* **45**, 1–8  
780 (2008).

781

782 **Figures**

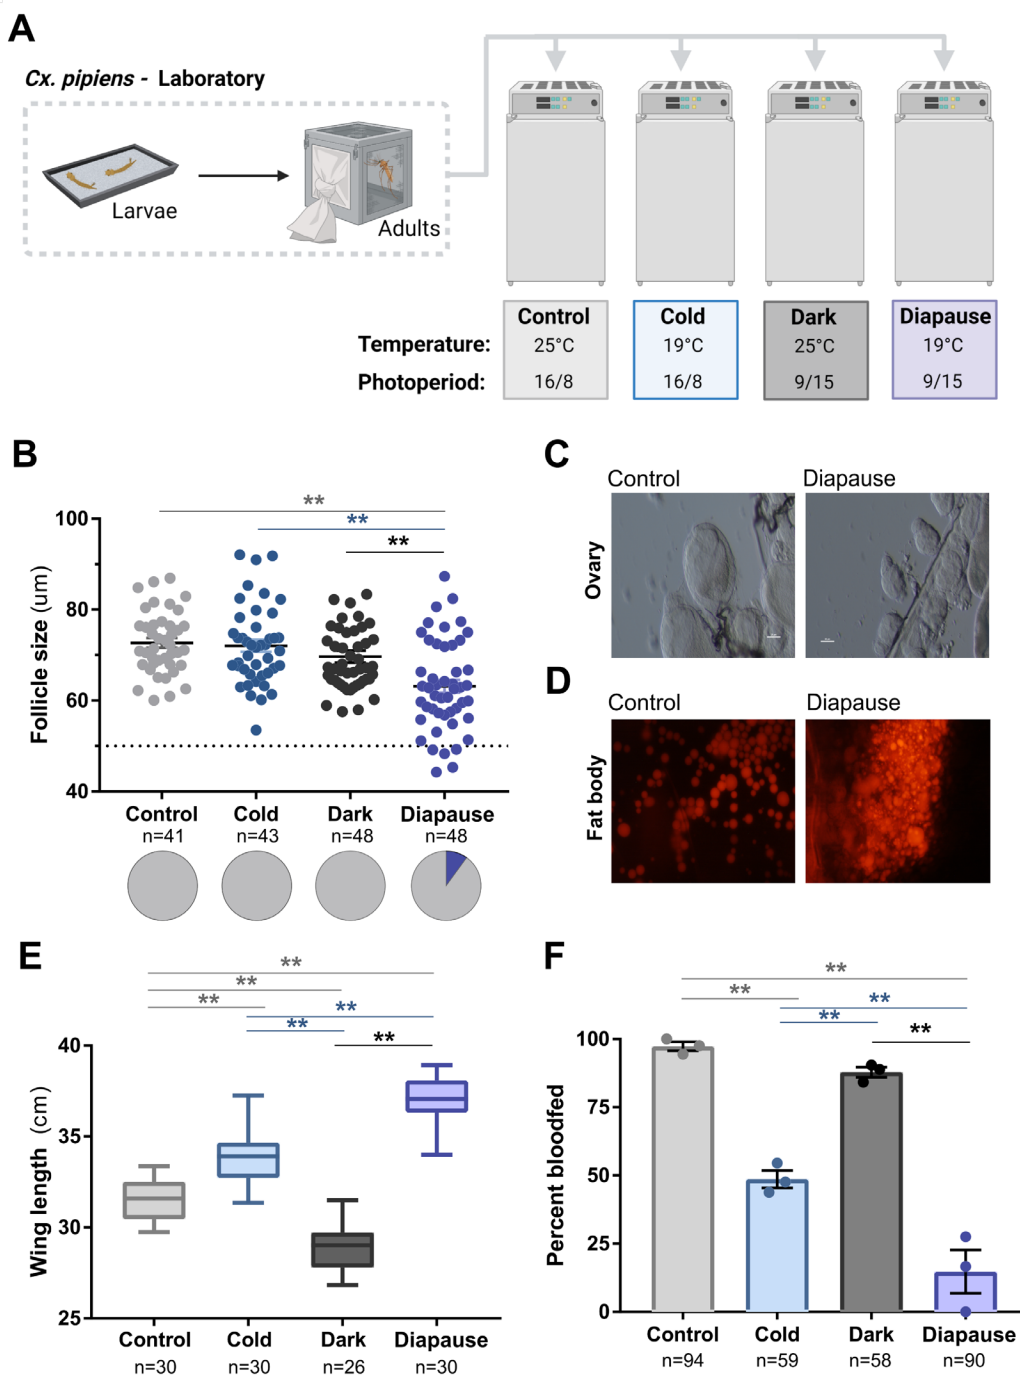

783

784 **Figure 1. Laboratory conditions to explore *Culex* diapause induction.** *Culex pipiens*  
 785 first-instar larvae were either maintained under standard insectary conditions (control) or  
 786 transferred to rearing conditions to examine the effects of cold temperature (cold), short  
 787 photoperiod (dark), or known conditions to promote diapause (A). Adult females were  
 788 collected from these respective conditions 6-8 days post-eclosion for downstream

789 experiments. **(B)** Ovary dissections were performed on adult mosquitoes from each  
790 rearing condition to determine the average primary follicle size to confirm reproductive  
791 diapause. Average primary follicle size is depicted for each individual mosquito, with an  
792 average follicle size was  $<50 \mu\text{m}$  (dotted line) used to confirm reproductive diapause.  
793 Solid black lines represent the median values for each experimental condition, while pie  
794 charts display the percentage of mosquitoes in diapause under each condition. Additional  
795 confirmations of mosquito diapause were performed by examining differences in ovarian  
796 follicle morphology **(C)** and fat body lipid staining with Nile Red **(D)** between mosquitoes  
797 reared under control or diapause conditions. **(E)** Wing length measurements on adult  
798 females were performed as a proxy body size for each condition. **(F)** Blood-feeding  
799 behavior was evaluated in adult female mosquitoes from each treatment by challenging  
800 with an artificial membrane feeder containing sheep blood. Significance was determined  
801 in follicle size, wing length, and blood-feeding experiments using a one-way ANOVA test  
802 and Tukey post-hoc comparisons to compare between experimental treatments.  
803 Asterisks denote significance (\*\*  $P < 0.01$ ). n, number of individual mosquitoes examined.

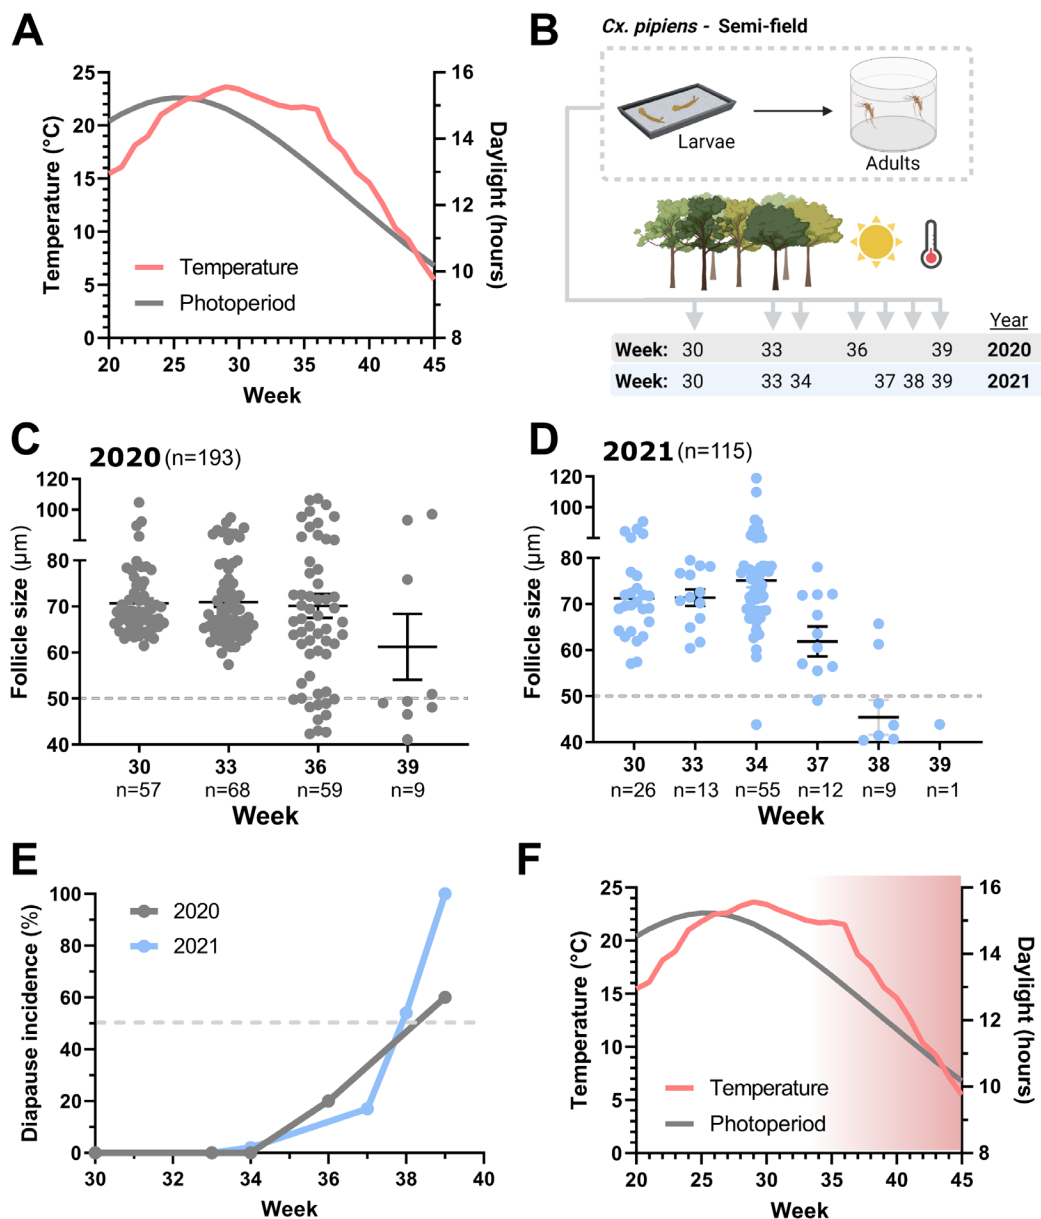

804

805 **Figure 2. Examining the natural diapause timeline in semi-field experiments.** (A)  
 806 Temperature (°C) and photoperiod (daylight) averages (2009-2019) are displayed for the  
 807 study site location (Ames, IA) over the mosquito season (weeks 20-45). (B) Overview of  
 808 the semi-field experiments performed in 2020 and 2021 where first-instar larvae from a  
 809 lab colony of *Cx. pipiens* were placed outside at weekly timepoints (between week 30 and  
 810 39). Larval groups were reared in a semi-field environment, with resulting adult females  
 811 used for downstream experiments 6-8 days post-eclosion. A total of 193 adult female  
 812 mosquitoes were collected in 2020 (C) and 115 adult females from 2021 (D) to determine  
 813 if mosquitoes were in reproductive diapause. For C and D, each dot represents the  
 814 average follicle size for an individual mosquito, with a 50 µm threshold (dotted line) used  
 815 to determine individuals in the diapause state. The mean follicle size (+/- SEM) is  
 816 displayed for each experimental cohort. n, number of individual mosquitoes examined.

817 (E) The percentage of adult diapause incidence recorded by larval onset week is  
818 summarized for 2020 and 2021. The dashed line corresponds to when 50% of the  
819 mosquitoes in a given larval onset week result in reproductive diapause. From our  
820 experiments, we define an approximate period of diapause receptivity (F), where larval  
821 development under temperature and photoperiod conditions of 13.5 hours of daylight and  
822 average temperatures under 20 °C may give rise to adult reproductive arrest, resulting in  
823 increasing diapause incidence (red gradient) as these environmental conditions continue  
824 to decrease over the course of the season.

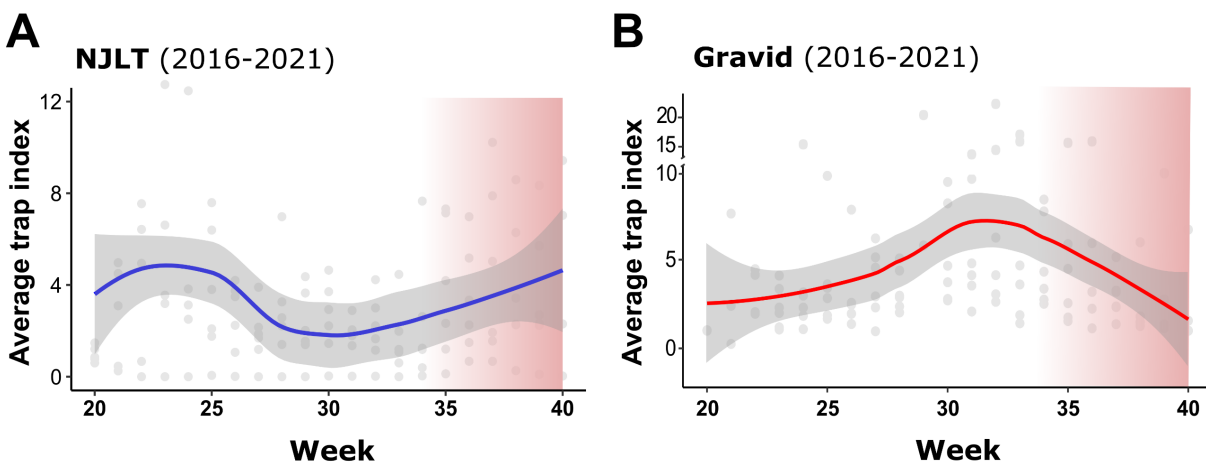

825

826 **Figure 3. Iowa mosquito surveillance data confirms the natural diapauses timeline.**  
827 Mosquito surveillance from central Iowa display mosquito populations trends that  
828 examine general population abundance (A) or represent only reproductive populations  
829 (B). Data in A represent *Cx. pipiens* group abundance measured using New Jersey Light  
830 Traps (NJLT) from 14 sites in central Iowa, while data in B display Gravid trap data from  
831 16 sites in central Iowa that monitor reproductive female *Cx. pipiens* populations. For both  
832 A and B, collections were performed from 2016-2021 from weeks 20 to 40. Individual  
833 grey dots represent yearly trap index averages by week, with the blue (NJLT) or red  
834 (Gravid) lines representing the loess-smoothed mean and 95% confidence intervals (grey  
835 shaded area). The approximate period of diapauses receptivity (as defined by our semi-  
836 field experiments) is displayed by the red gradient.



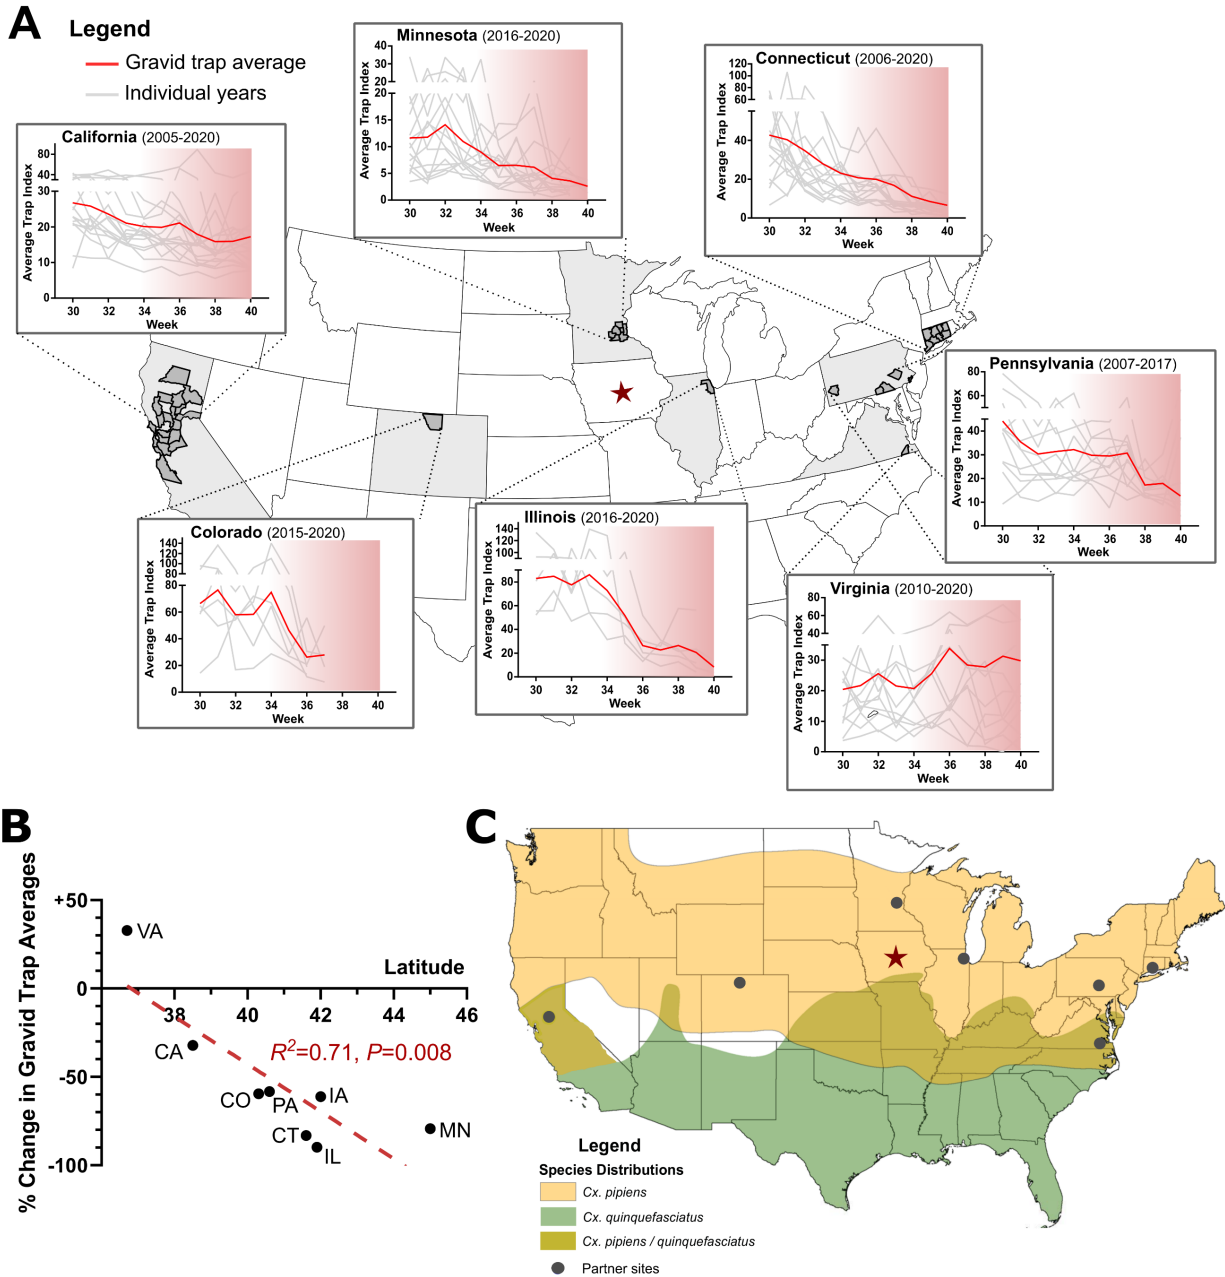

837

838 **Figure 4. Gravid population trends from across the United States provide insight**  
 839 **into the biotic and abiotic factors that influence *Cx. pipiens* diapause. (A)** End-of-  
 840 **season *Cx. pipiens* gravid trap data (weeks 30-40) provided by locations across the**  
 841 **United States. States included in our analysis are denoted in light grey, with individual**  
 842 **county-level data included in the statewide analysis shown in dark grey. Iowa is denoted**  
 843 **by the red star. For each state, red lines represent the loess-smoothed mean of the gravid**  
 844 **(reproductive) population abundance, while grey lines display data from an individual year**  
 845 **included in our analysis. The approximate period of diapause receptivity (as defined by**  
 846 **our semi-field experiments) is displayed by the red gradient. (B)** Sites at higher latitudes

847 demonstrated more pronounced declines in gravid trap averages from the weeks 30-33  
848 to week 40. (C) Map of the reported distributions of *Cx. pipiens* (yellow), *Cx.*  
849 *quinquefasciatus* (green), and areas of potential genetic hybridization between these  
850 species (olive). Site locations providing gravid trap data are shown by the grey dots, while  
851 Iowa is denoted by the red star.

852

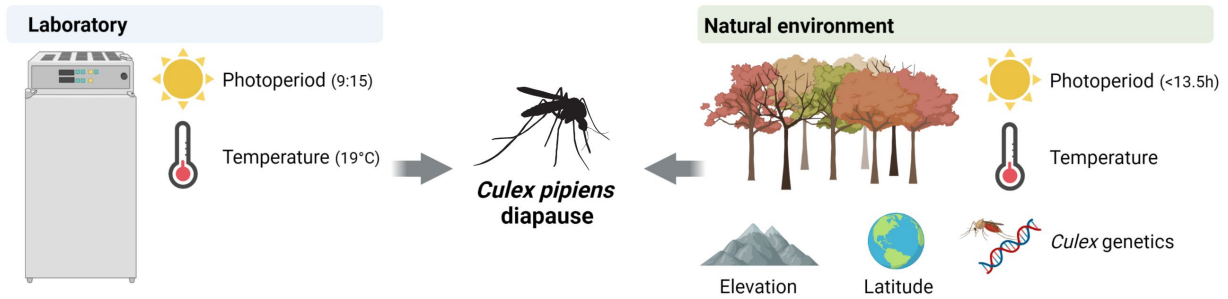

853

854 **Figure 5. Overview of the factors that influence *Cx. pipiens* diapause in the**  
855 **laboratory and under natural conditions.** The combination of short-day lengths and  
856 low temperatures form the basis for diapause induction in laboratory studies of *Cx.*  
857 *pipiens*, yet additional ecological factors (latitude, elevation, population genetics)  
858 influence diapause dynamics in natural settings.
